# Supplementary material
Source: publisher site journal article supplement (https://www.dovepress.com/get_supplementary_file.php?f=276153.docx)
Supplement: Supplementary file 1 [file get_supplementary_file.php]

**Supporting Information**

**Host immune response triggered by Graphene quantum-dot-mediated photodynamic therapy for oral squamous cell carcinoma**

Xiliu Zhang1

Hongyu Li1,*

Chen Yi1,*

Guosheng Chen2

Ye Li1

Ying Zhou1

Guanhui Chen1

Yiming Li1

Yi He1

Dongsheng Yu 1

**Supplementary text S1**

**Characterization Methods**

The morphologies of GQD-PEG were visualized by transmission electron microscopy (TEM; JEM 1400, Tokyo, Japan). Energy-dispersive spectroscopy (EDS) was used to analyze elemental composition. Fourier transform infrared spectroscopy (FTIR; Thermo Fisher Scientific, Inc., Waltham, MA, USA) was used to examine the surface functional groups of GQD-PEG. UV-vis absorption and fluorescence intensity were measured by UV-vis spectrophotometry (Lambda 950, PerkinElmer, Shelton, CT, USA). The stability of GQD-PEG in different solutions (saline solution, PBS, serum, and DMEM) was observed after 72 h.

**Cell Viability**

For cell viability, cells were seeded in 96-well plates at a density of 104 cells/mL and cultured for 24 h. Then the culture medium was replaced with fresh medium containing serial concentrations (0, 10, 25, 50, 100, 150, 200 μg/mL) of GQD-PEG for another 12 h. A portion of viable cells was estimated by means of the Cell Counting Kit‑8 assay (CCK-8; Dojindo, Tokyo, Japan).

**Bio-Safety Evaluation**

Throughout the experimental animal procedure, the body weights of C3H mice were measured every 2 days. At the conclusion of the animal experiments, the major organs of each group, including lung, kidney, spleen, and liver, were harvested, collected with 4% paraformaldehyde, and sectioned into slices for histopathological evaluation by H&E staining.


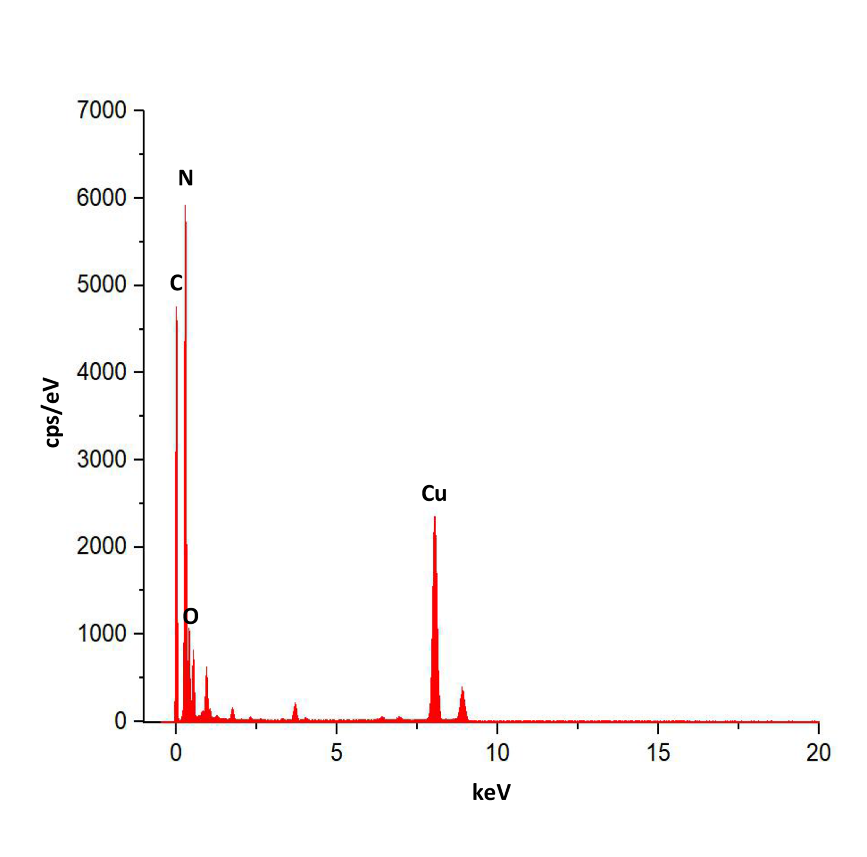


**Figure S1** Energy-dispersive spectroscopy of GQD-PEG.


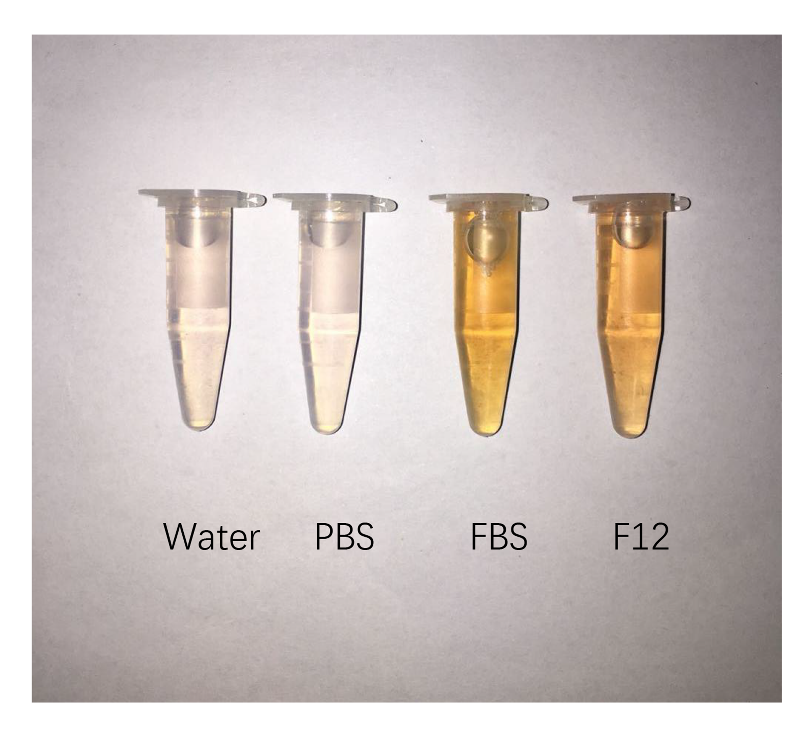


**Figure S2** Images of the GQD-PEG in different media (water, PBS, FBS, and F12), taken under visible light.


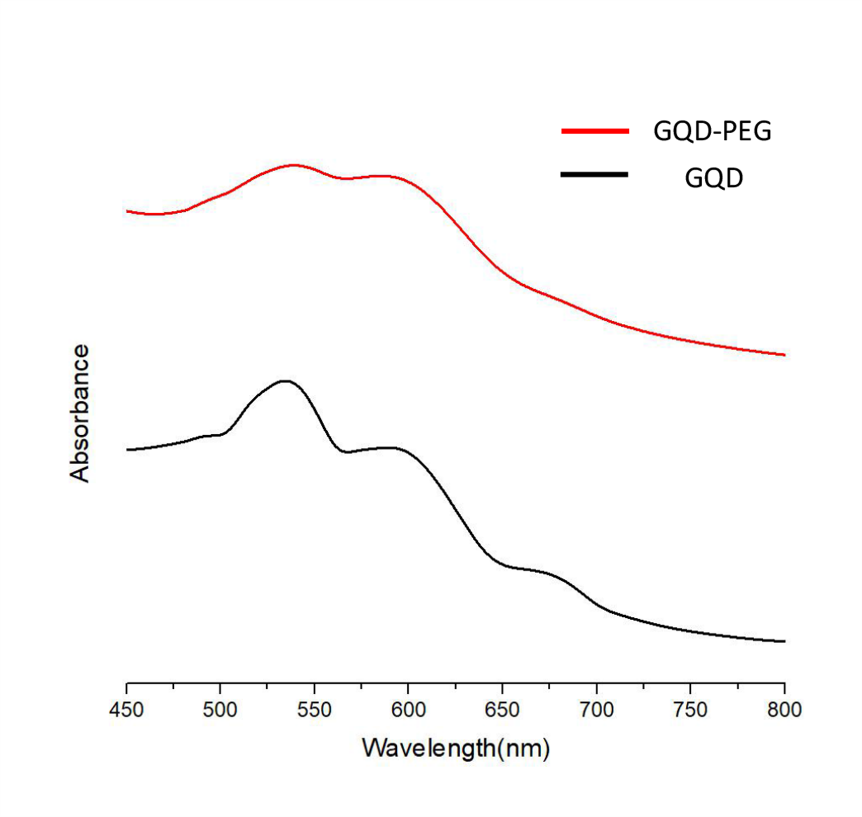


**Figure S3** UV-vis absorption of GQD-PEG ranging from 450nm to 800nm.


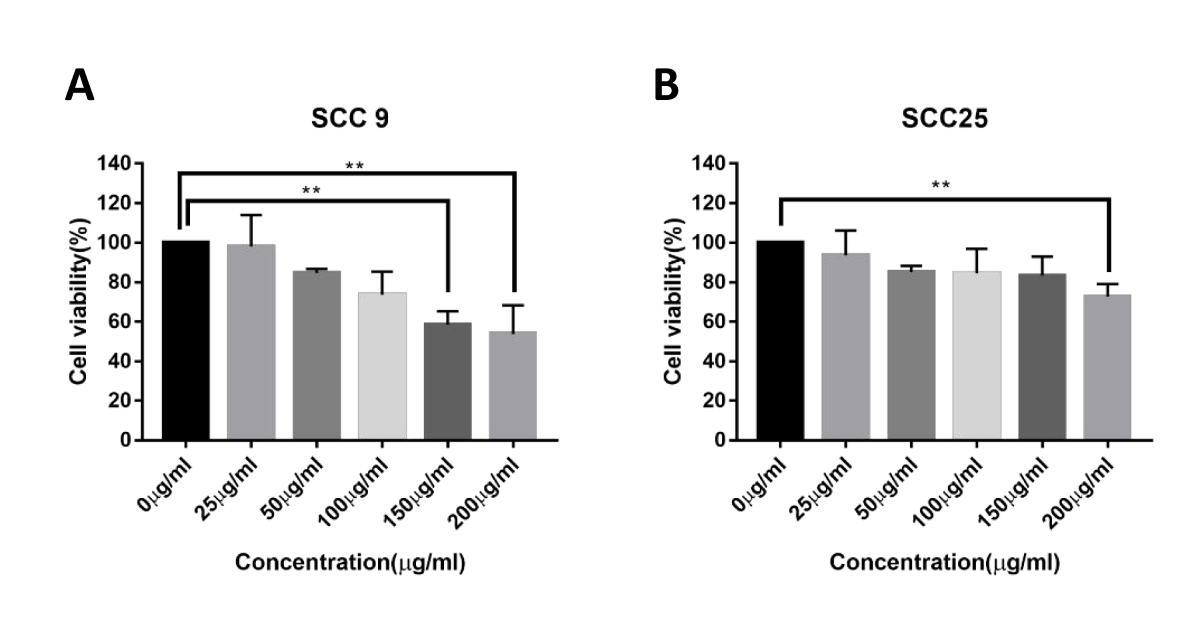


**Figure S4** Cytotoxicity of GQD-PEG at different concentrations (0, 10, 25, 50, 100, 150, and 200 µg/mL) for (A) SCC 9 and (B) SCC25 cells. ***P*<0.01.


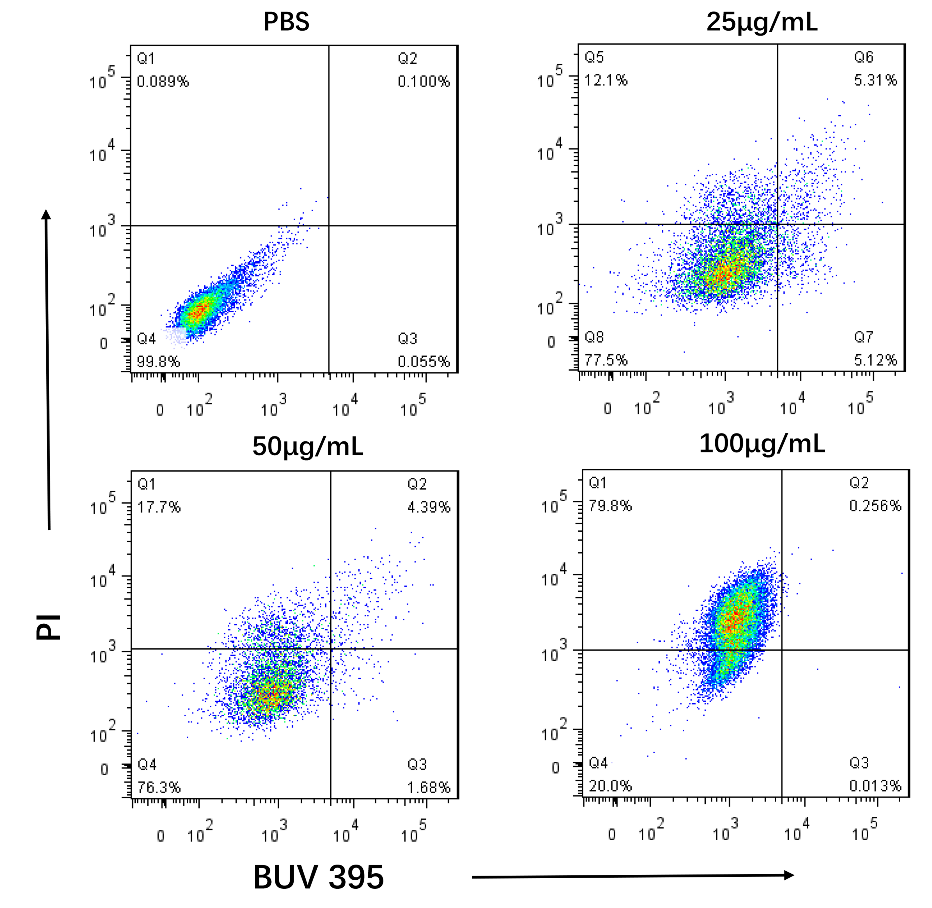


**Figure S5** Apoptosis in SCC9 cells induced by GQD-PEG via flow cytometry. BUV 395 staining was used for early apoptosis and PI staining for late apoptosis.


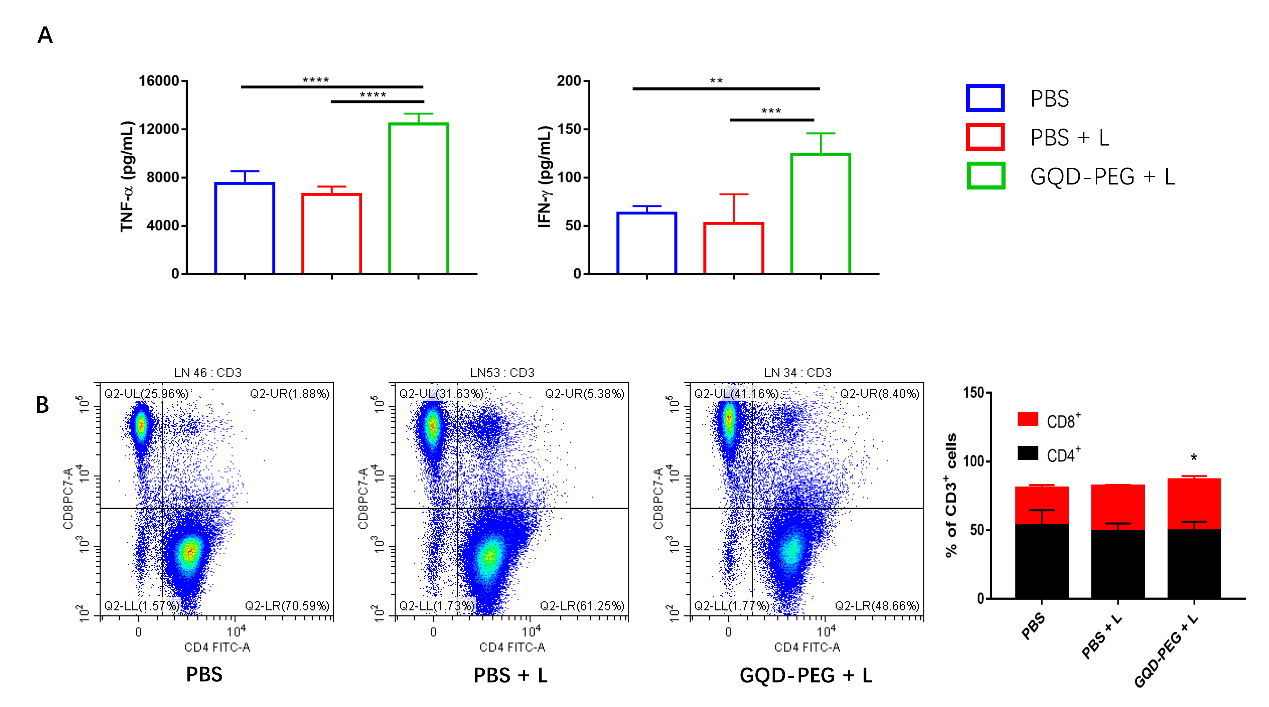


**Figure S6** GQD-PEG-mediated PDT highly enhanced antitumor immunity. (A) Production of TNF-α and IFN-γ in serum was determined by ELISA. (B) Percentages of CD3+CD4+ T cells and CD3+CD8+ T cells in the TDLN. **P*<0.05; ***P*<0.01; ****P*<0.0001; *****P*<0.0001.


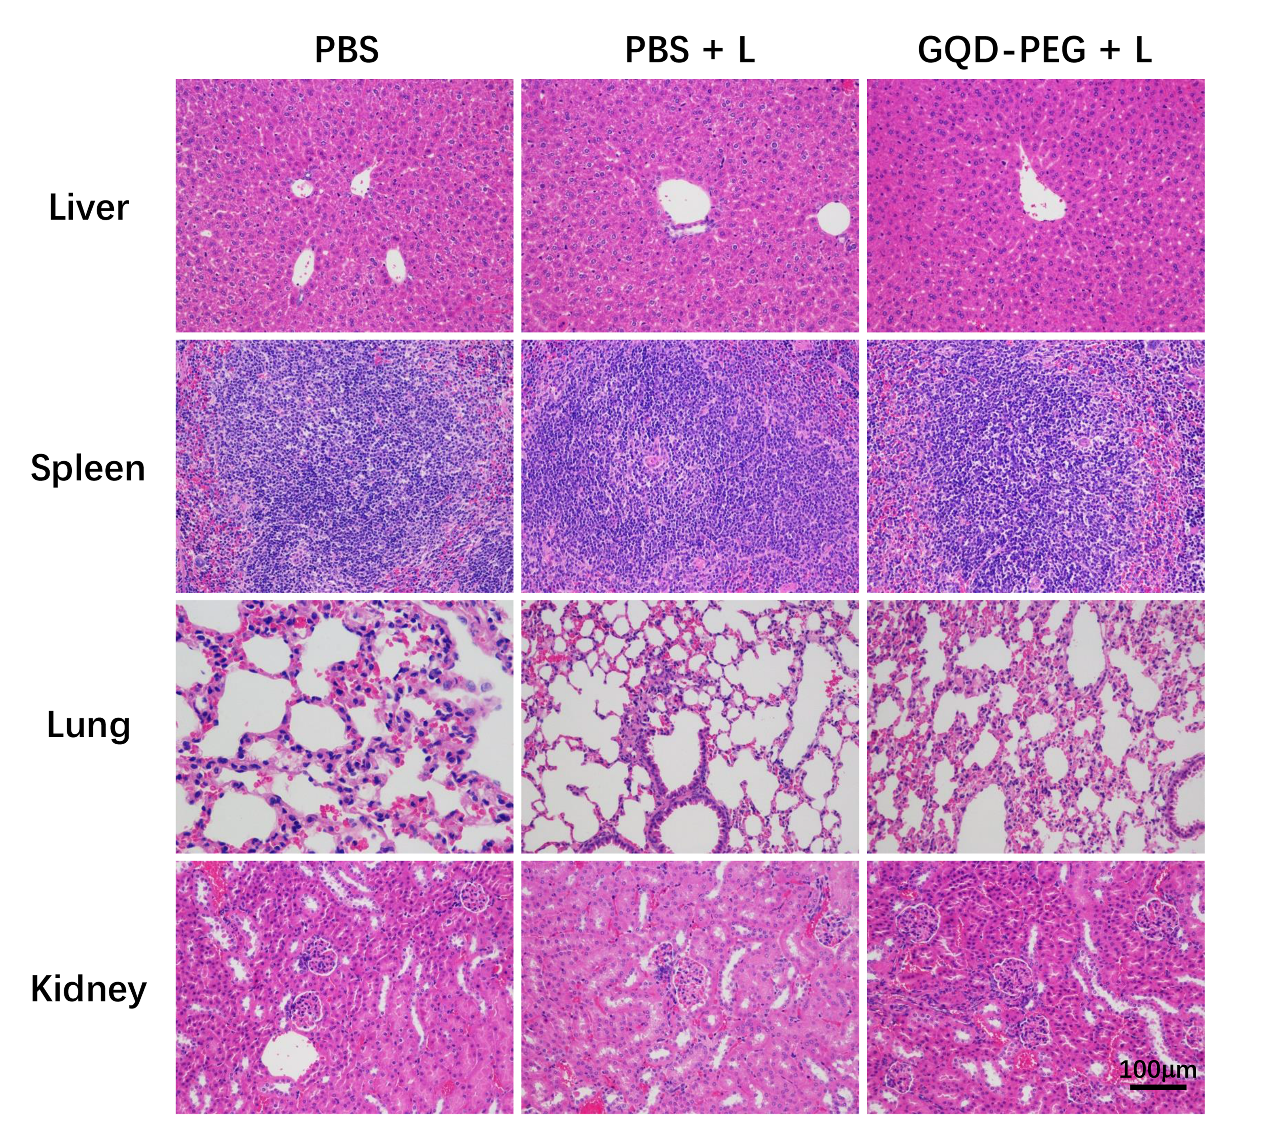


**Figure S7** Histological evaluation of the major organs from the mice in the different treatment groups.
